# Supplementary material
Source: PubMed Central journal article supplement (PMC4667435)
Supplement: ncomms9297-s1.pdf [file ncomms9297-s1.pdf]

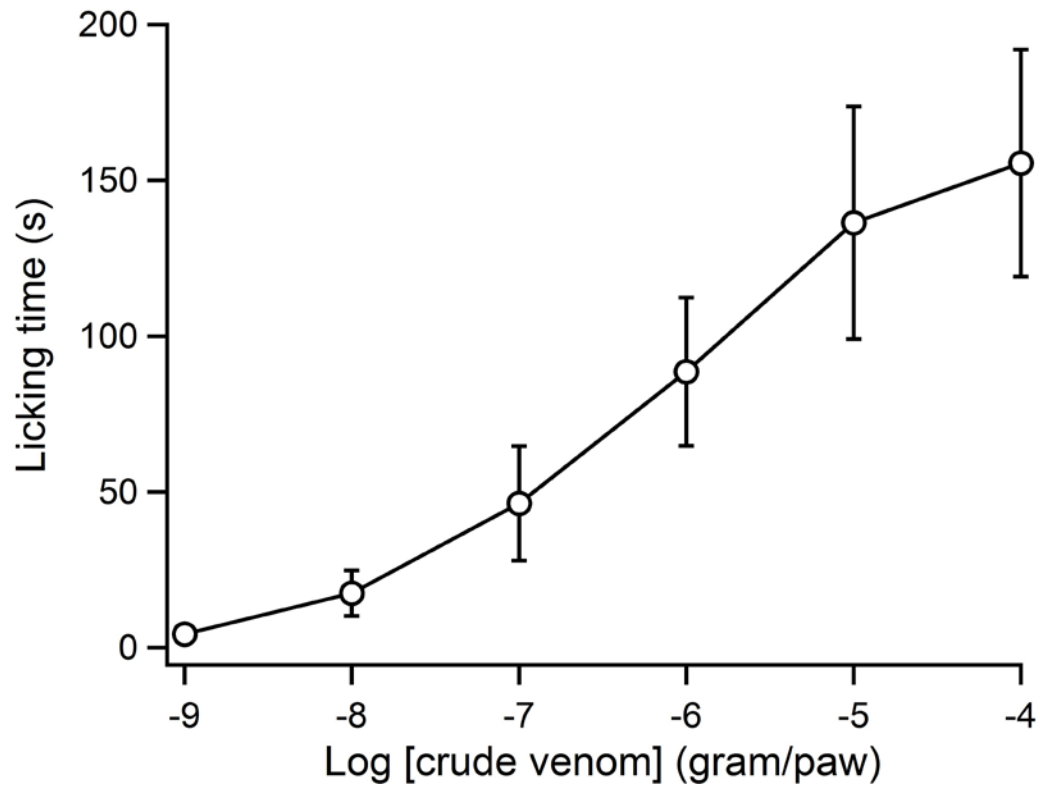

**Supplementary Figure 1.** Centipede crude venom-induced paw licking. Pain behavior was induced in mice by intraplantar injection of centipede crude venom. After crude venom injection, mice were immediately placed individually into open polyvinyl cages (20 × 40 × 15 cm). The time spent licking the injected paw was recorded by digital video camera during 0-10 minutes post-injection. Centipede crude venom induced strong pain behavior in a dose-dependent manner. Data points were presented as average ± sem (n = 5-to-8 in each group).

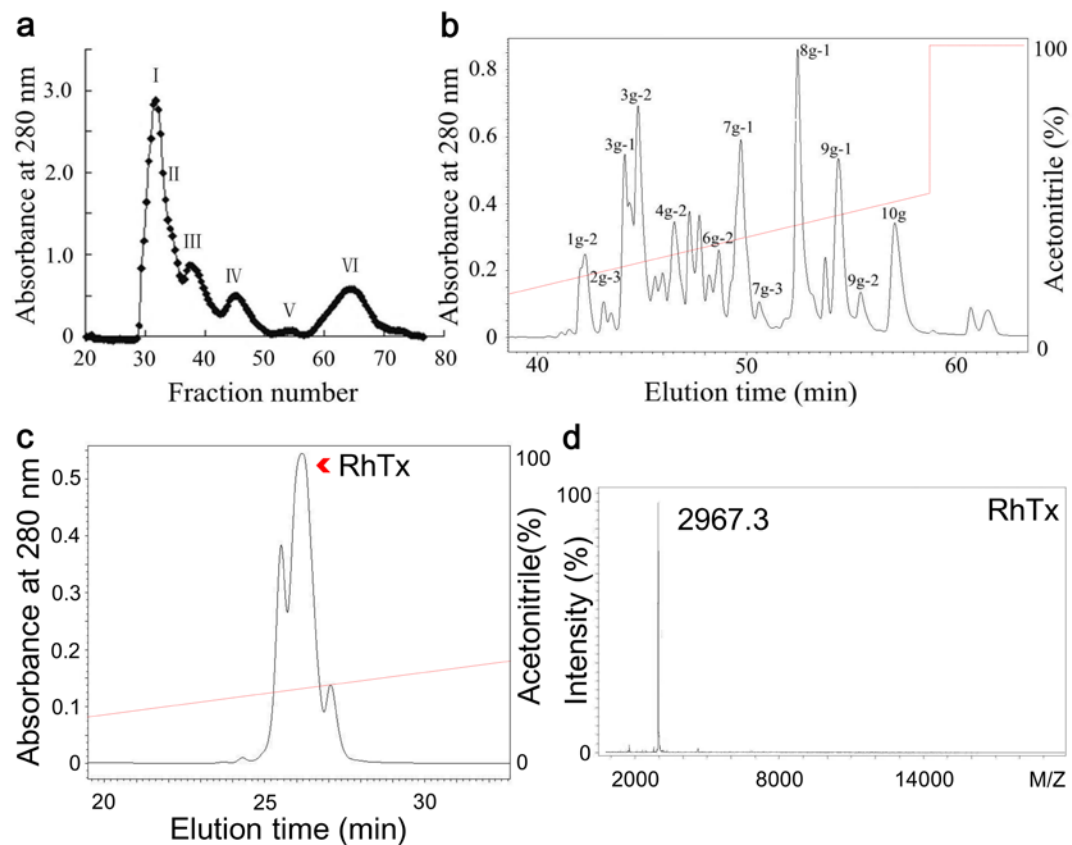

**Supplementary Figure 2.** Purification of RhTx. (a) Diluted crude venom of Chinese Red-headed centipede was subjected to Sephadex G-50 gel filtration. Protein fraction IV was pooled and further purified by using C18 RP-HPLC column. (b) Protein fraction 3g-1 containing RhTx was pooled. (c) RhTx was purified using analytical C18 RP-HPLC. (d) MALDI-TOF spectral analysis of RhTx revealed its molecular weight at 2967.3 Da.

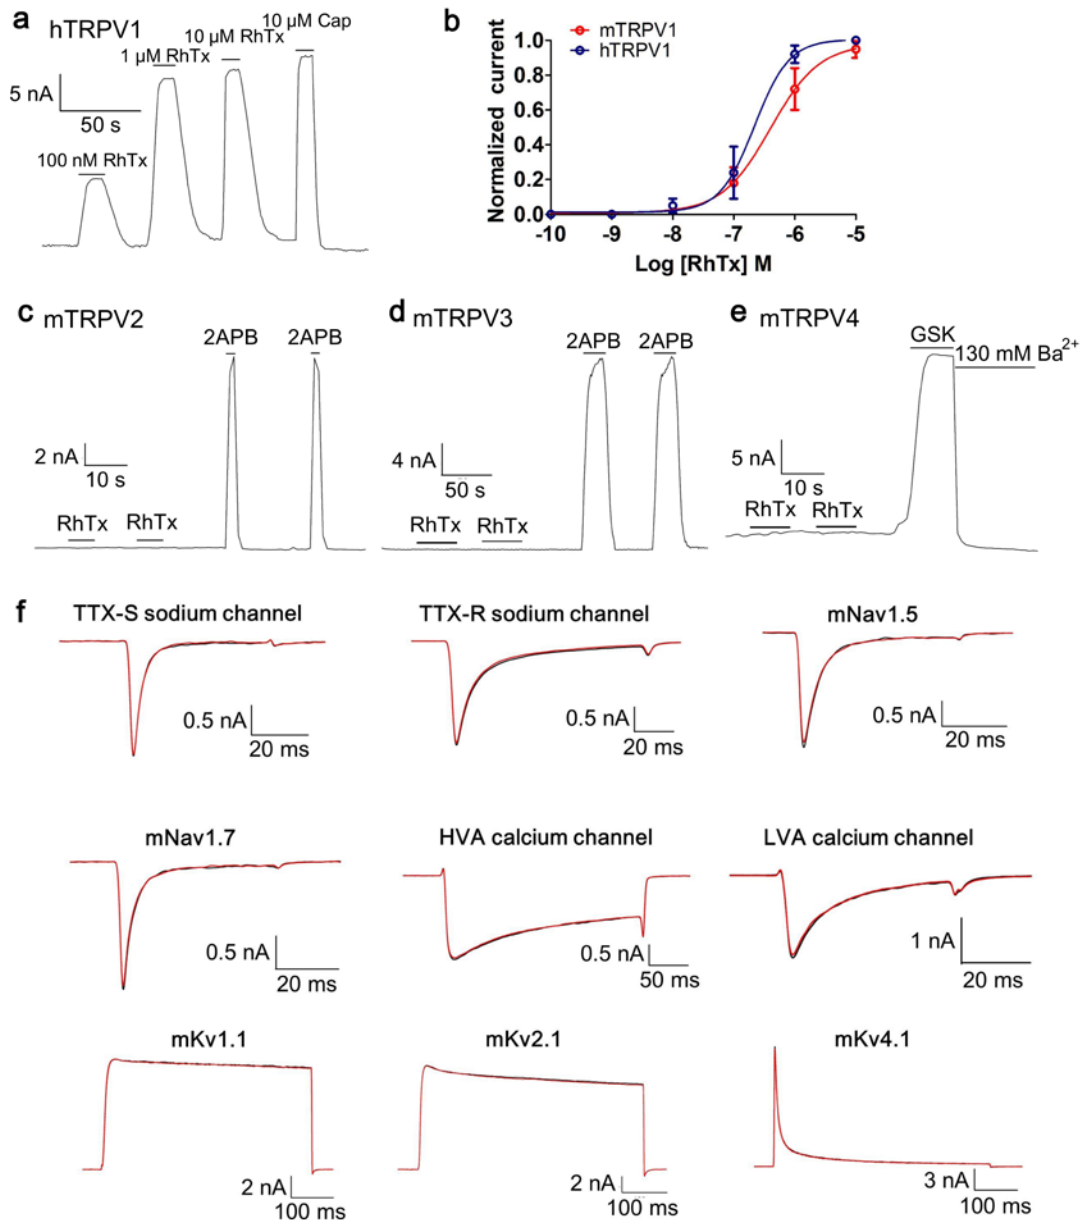

**Supplementary Figure 3.** RhTx is highly selective for TRPV1. (a) A representative whole-cell recording of hTRPV1 treated with RhTx or capsaicin. (b) Comparison of the dose-response relationships between hTRPV1 and mTRPV1. (c-e) RhTx at 10  $\mu$ M has no detectable effect on mTRPV2 (c), mTRPV3 (d) and mTRPV4 (e). (f) Treatment with 10  $\mu$ M RhTx (red traces) exhibited no detectable effect compared to toxin-free treatment (black traces) on voltage-gated Na, K, Ca channels.

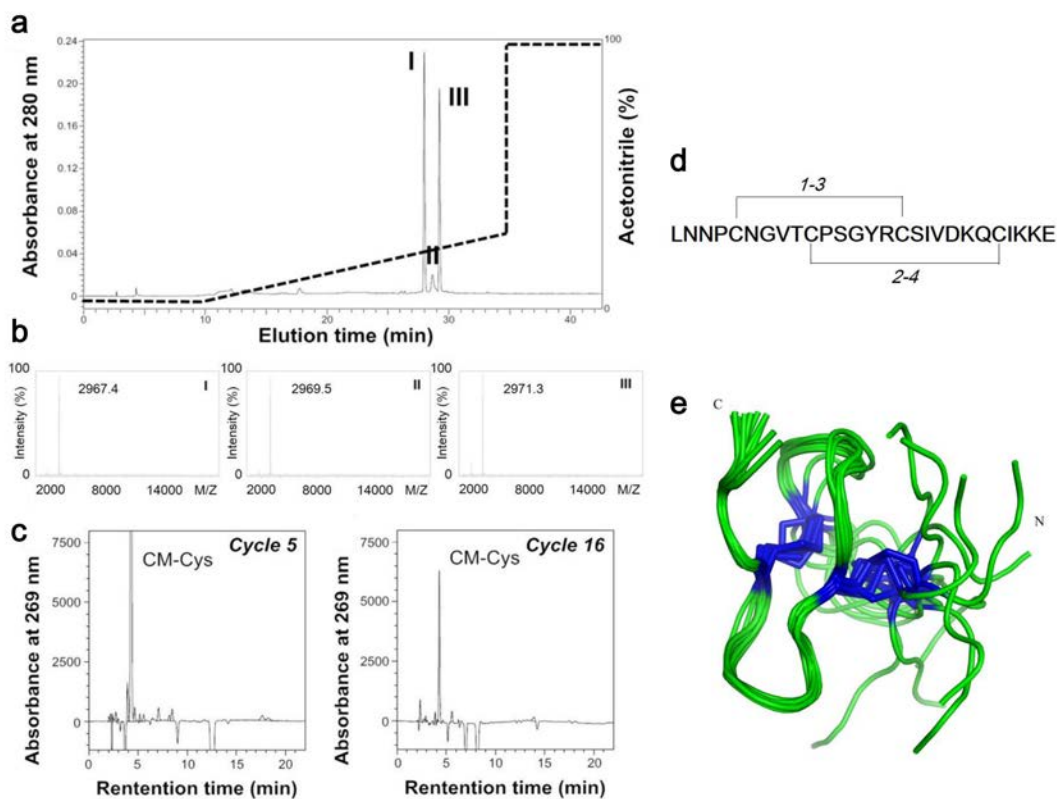

**Supplementary Figure 4.** Determination of disulfide bridges in RhTx and NMR structures. (a) RP-HPLC chromatograph of RhTx after partial reduction with TCEP, which yielded three major species labeled as I, II, and III. (b-d) MALDI-TOF spectral analysis of peak I, II and III indicated that they correspond to non-reduced RhTx (peak I), RhTx with one reduced disulfide bridge (peak II), or RhTx with two reduced disulfide bridges (peak III). Partially reduced peptides of peak II were alkylated with iodoacetamide for 1 min and then purified using analytical C18 RP-HPLC. Edman degradation analysis yielded signals for alkylated Cys residues (Pth-CM-Cys) in cycles 5 and 16, indicative of 5-to-16 and 10-to-23 assignments of the disulfide bridge framework in RhTx. (e) An ensemble of 10 RhTx structures, with the disulfide bridges shown in blue.

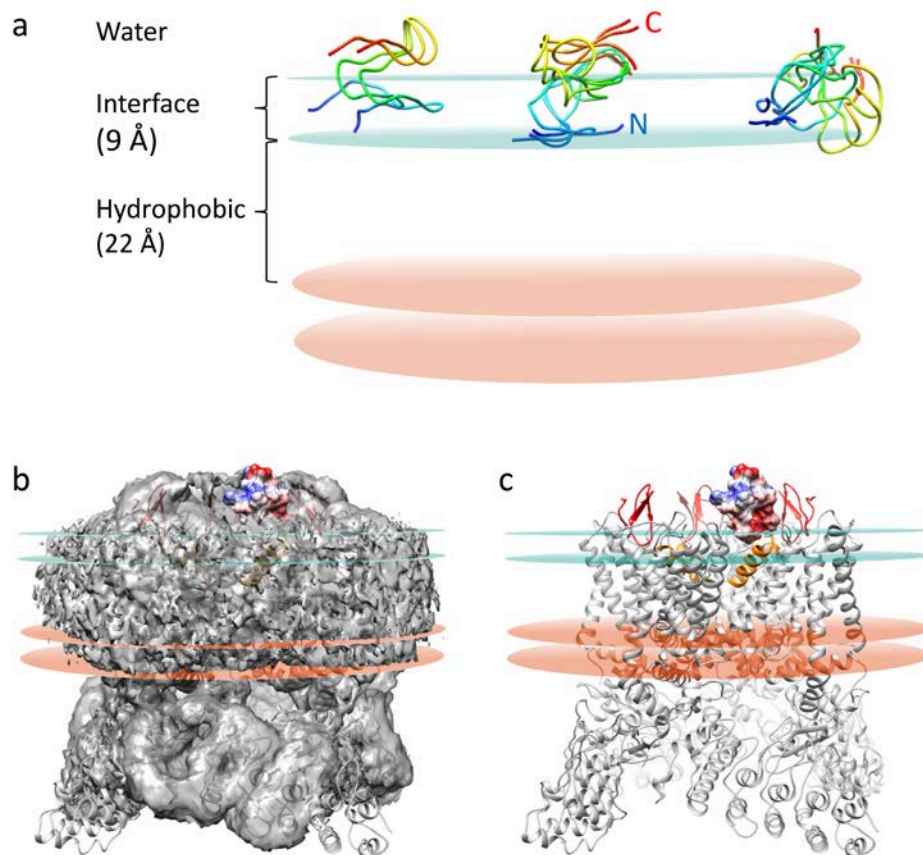

**Supplementary Figure 5.** Interactions between RhTx and lipid membrane probed by computation. (a) Implicit membrane environment is setup as the hydrophobic, interface and water layers in Rosetta. RhTx participates mainly within the interface (defined by two cyan planes) between hydrophobic core of lipid membrane and aqueous environment. Three clusters of the 10 NMR structure models of RhTx are observed after scoring by RosettaMembrane energy function. RhTx are rainbow colored by sequence. The uncharged N terminus (blue) of RhTx points towards the hydrophobic layer of membrane, while the charged C terminus (red) stays in water. (b) The same implicit membrane environment as shown in (a) is mapped onto the cryo-EM density map of TRPV1 (EMD ID: 5776, contoured at level 3). The observed electron density of amphipols, which indicate the transmembrane region of TRPV1, distributes mostly within this implicit membrane environment. The surface of RhTx colored by electrostatic potential is shown. (c) Structural model of TRPV1 in complex with RhTx (colored electrostatic potential surface) and DkTx (red ribbons).

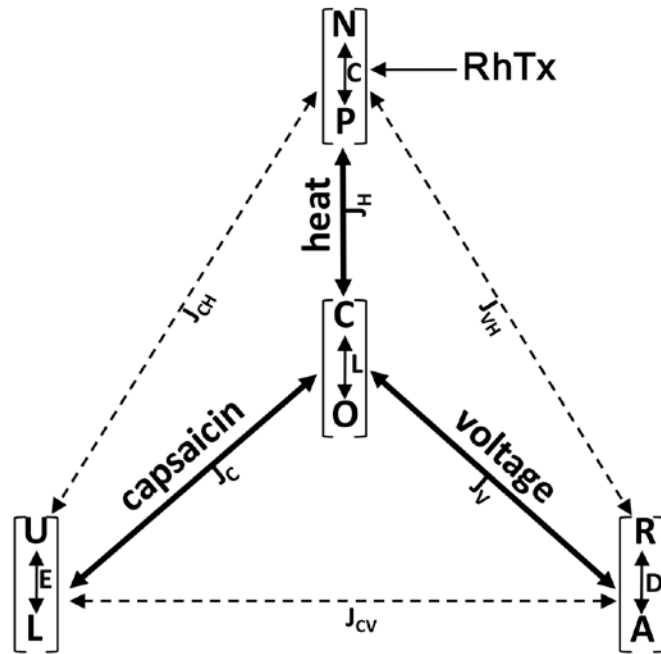

**Supplementary Figure 6.** An allosteric model for predicting agonist response to cooling. In this generic model, channel activators capsaicin, voltage, and heat are assumed to promote channel pore opening  $C \leftrightarrow O$  by allosteric coupling through distinct pathways, as described in Experimental Procedures. Detail descriptions of model parameters and calculations are given in a recent report<sup>1</sup>.

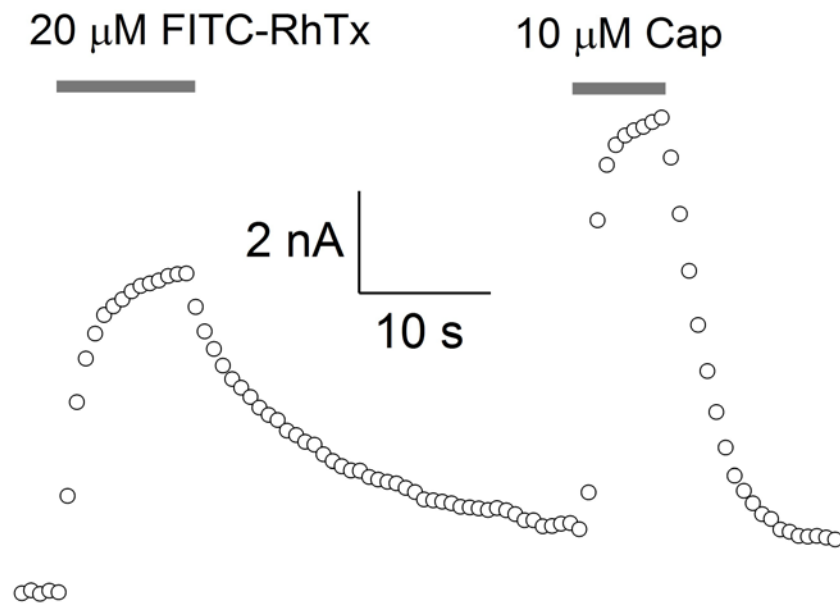

**Supplementary Figure 7.** FITC-RhTx activates TRPV1. Representative whole-cell recording of TRPV1 channels at +80 mV activated by RhTx labeled with FITC at its N terminus. 10 μM Capsaicin was applied as a positive control.

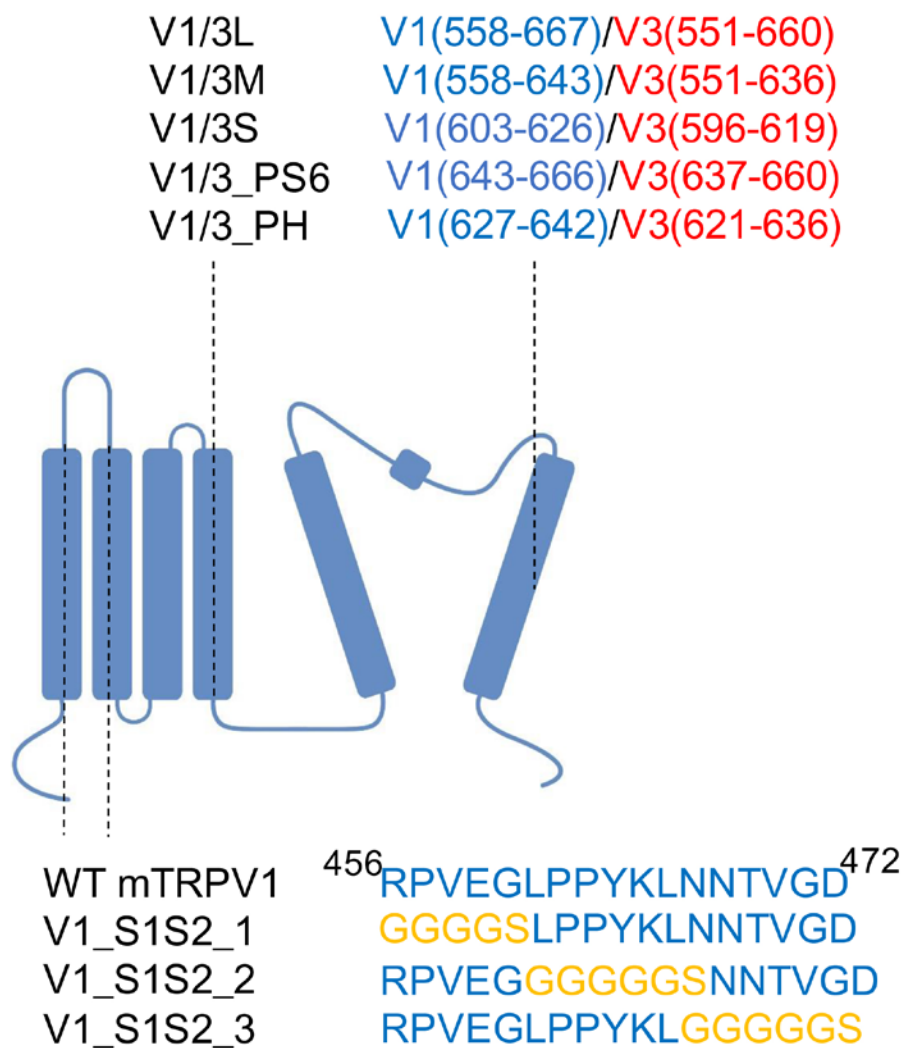

**Supplementary Figure 8.** Designs of the TRPV1/TRPV3 chimeric channels and the S1-S2 linker sequence replacement mutants.



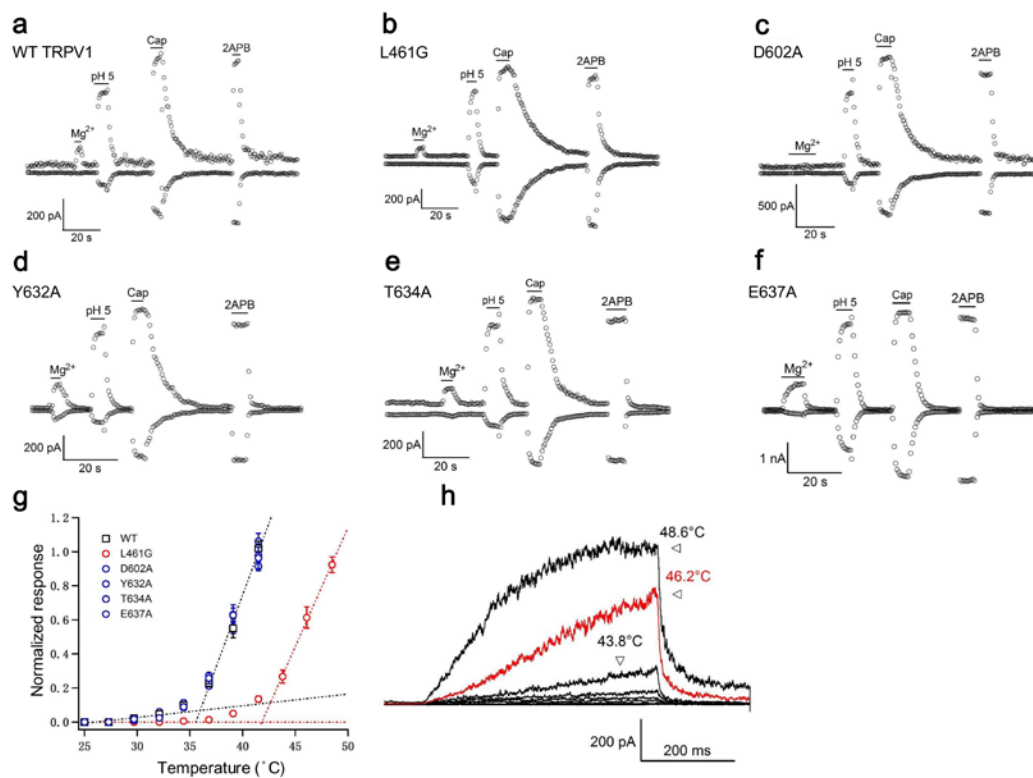

**Supplementary Figure 9.** TRPV1 point mutants retain near-normal gating functions. (a-f) Outside-out patch recordings demonstrating activation of WT mTRPV1 or point mutants by 130 mM  $Mg^{2+}$ , proton (pH 5.0), 10  $\mu$ M capsaicin and 3 mM 2APB. (g) Heat-induced activation of WT mTRPV1 and point mutants. While all the channels were heat-activated, L461G exhibited a significant shift in the activation threshold temperature to a higher temperature comparing to WT or the other mutants, suggesting that the mutation affected the normal heat activation process. The observation is fully consistent with reports that sequence perturbations to the S1-S2 linker could disrupt  $Mg^{2+}$ - and heat-dependent activation<sup>1</sup> and  $H^+$ -dependent activation<sup>2</sup> of TRPV1, as well as voltage-dependent activation of Kv channels<sup>3</sup>. (h) Outside-out patch recordings of L461G activation induced by laser heating.

**Supplementary Table 1.** Example animal peptide toxins and their lengths.

| Name                                        | Length (amino acids) |
|---------------------------------------------|----------------------|
| Spider double-knot toxin, DkTx              | 75                   |
| Snake $\alpha$ -bungarotoxin, $\alpha$ -BTx | 74                   |
| Scorpion charybdotoxin, CTx                 | 37                   |
| Spider hanatoxin, HaTx                      | 35                   |
| Cone snail conotoxins                       | 12 to 30             |
| Centipede red-head toxin, RhTx              | 27                   |

**Supplementary Table 2.** NMR and refinement statistics for RhTx.

|                                     | RhTx          |
|-------------------------------------|---------------|
| NMR distance & dihedral constraints |               |
| Distance constraints                |               |
| Total NOE                           | 216           |
| Intra-residue                       | 105           |
| Inter-residue                       | 111           |
| Sequential ( $ i-j  = 1$ )          | 69            |
| Medium-range ( $ i-j  < 4$ )        | 13            |
| Long-range ( $ i-j  > 5$ )          | 29            |
| Intermolecular                      | 0             |
| Hydrogen bonds                      | 0             |
| Total dihedral angle restraints     | 15            |
| phi                                 | 15            |
| Psi                                 | 0             |
|                                     |               |
| Structure Statistics                |               |
| Violations (mean and s.d.)          |               |
| Distance constraints (Å)            | 0.041 ± 0.005 |

|                                                 |                |
|-------------------------------------------------|----------------|
| Dihedral angle constraints (°)                  | 0.948 ± 0.162  |
| Max. dihedral angle violation (°)               | 1.38           |
| Max. distance constraint violation (Å)          | 0.314          |
| Deviations from idealized geometry              |                |
| Bond (Å)                                        | 0.004 ± 0.0002 |
| Angles (°)                                      | 0.568 ± 0.048  |
| Improper (°)                                    | 1.475 ± 0.201  |
| Average pairwise r.m.s.d. ** (Å, 2rd structure) |                |
| Heavy                                           | 1.29 ± 0.21    |
| Backbone                                        | 0.75 ± 0.22    |

\*\* Pairwise r.m.s.d. was calculated among 20 refined structures.

### Supplementary References

- 1 Cao, X., Ma, L., Yang, F., Wang, K. & Zheng, J. Divalent cations potentiate TRPV1 channel by lowering the heat activation threshold. *The Journal of general physiology* **143**, 75-90, doi:10.1085/jgp.201311025 (2014).
- 2 Boukalova, S., Teisinger, J. & Vlachova, V. Protons stabilize the closed conformation of gain-of-function mutants of the TRPV1 channel. *Biochimica et biophysica acta* **1833**, 520-528, doi:10.1016/j.bbamcr.2012.11.017 (2013).
- 3 Lee, S. Y., Banerjee, A. & MacKinnon, R. Two separate interfaces between the voltage sensor and pore are required for the function of voltage-dependent K(+) channels. *PLoS biology* **7**, e47, doi:10.1371/journal.pbio.1000047 (2009).
